# Supplementary material
Source: ML conference proceedings conference paper supplement (https://proceedings.neurips.cc/paper_files/paper/2020/hash/d35b05a832e2bb91f110d54e34e2da79-Abstract.html)
Supplement: Supplementary file [file d35b05a832e2bb91f110d54e34e2da79-Supplemental.pdf]

## A Mathematical Background

Our mechanisms are built with some important mathematical tools. First, in probability theory, an  $f$ -divergence is a function that measures the difference between two probability distributions.

**Definition A.1** ( $f$ -divergence). *Given a convex function  $f$  with  $f(1) = 0$ , for two distributions over  $\Omega$ ,  $p, q \in \Delta\Omega$ , define the  $f$ -divergence of  $p$  and  $q$  to be*

$$D_f(p, q) = \int_{\omega \in \Omega} p(\omega) f\left(\frac{q(\omega)}{p(\omega)}\right).$$

In duality theory, the convex conjugate of a function is defined as follows.

**Definition A.2** (Convex conjugate). *For any function  $f : \mathbb{R} \rightarrow \mathbb{R}$ , define the convex conjugate function of  $f$  as*

$$f^*(y) = \sup_x xy - f(x).$$

Then the following inequality ([22, 16]) holds.

**Lemma A.1** (Lemma 1 in [22]). *For any differentiable convex function  $f$  with  $f(1) = 0$ , any two distributions over  $\Omega$ ,  $p, q \in \Delta\Omega$ , let  $\mathcal{G}$  be the set of all functions from  $\Omega$  to  $\mathbb{R}$ , then we have*

$$D_f(p, q) \geq \sup_{g \in \mathcal{G}} \int_{\omega \in \Omega} g(\omega)q(\omega) - f^*(g(\omega))p(\omega) d\omega = \sup_{g \in \mathcal{G}} \mathbb{E}_q g - \mathbb{E}_p f^*(g).$$

*A function  $g$  achieves equality if and only if  $g(\omega) \in \partial f\left(\frac{q(\omega)}{p(\omega)}\right) \forall \omega$  with  $p(\omega) > 0$ , where  $\partial f\left(\frac{q(\omega)}{p(\omega)}\right)$  represents the subdifferential of  $f$  at point  $q(\omega)/p(\omega)$ .*

The  $f$ -mutual information of two random variables is a measure of the mutual dependence of two random variables, which is defined as the  $f$ -divergence between their joint distribution and the product of their marginal distributions.

**Definition A.3** (Kronecker product). *Consider two matrices  $\mathbf{A} \in \mathbb{R}^{m \times n}$  and  $\mathbf{B} \in \mathbb{R}^{p \times q}$ . The Kronecker product of  $\mathbf{A}$  and  $\mathbf{B}$ , denoted as  $\mathbf{A} \otimes \mathbf{B}$ , is defined as the following  $pm \times qn$  matrix:*

$$\mathbf{A} \otimes \mathbf{B} = \begin{bmatrix} a_{11}\mathbf{B} & \cdots & a_{1n}\mathbf{B} \\ \vdots & \ddots & \vdots \\ a_{m1}\mathbf{B} & \cdots & a_{mn}\mathbf{B} \end{bmatrix}.$$

**Definition A.4** ( $f$ -mutual information and pointwise MI). *Let  $(X, Y)$  be a pair of random variables with values over the space  $\mathcal{X} \times \mathcal{Y}$ . If their joint distribution is  $p_{X,Y}$  and marginal distributions are  $p_X$  and  $p_Y$ , then given a convex function  $f$  with  $f(1) = 0$ , the  $f$ -mutual information between  $X$  and  $Y$  is*

$$I_f(X; Y) = D_f(p_{X,Y}, p_X \otimes p_Y) = \int_{x \in \mathcal{X}, y \in \mathcal{Y}} p_{X,Y}(x, y) f\left(\frac{p_X(x) \cdot p_Y(y)}{p_{X,Y}(x, y)}\right).$$

*We define function  $K(x, y)$  as the reciprocal of the ratio inside  $f$ ,*

$$K(x, y) = \frac{p_{X,Y}(x, y)}{p_X(x) \cdot p_Y(y)}.$$

If two random variables are independent conditioning on another random variable, we have the following formula for the function  $K$ .

**Lemma A.2.** *When random variables  $X, Y$  are independent conditioning on  $\theta$ , for any pair of  $(x, y) \in \mathcal{X} \times \mathcal{Y}$ , we have*

$$K(x, y) = \sum_{\theta \in \Theta} \frac{p(\theta|x)p(\theta|y)}{p(\theta)}$$

*if  $|\Theta|$  is finite, and*

$$K(x, y) = \int_{\theta \in \Theta} \frac{p(\theta|x)p(\theta|y)}{p(\theta)} d\theta$$

*if  $\Theta \subseteq \mathbb{R}^m$ .*

*Proof.* We only prove the second equation for  $\Theta \subseteq \mathbb{R}^m$  as the proof for finite  $\Theta$  is totally similar.

$$\begin{aligned} K(x, y) &= \frac{p(x, y)}{p(x) \cdot p(y)} \\ &= \frac{\int_{\theta \in \Theta} p(x|\theta)p(y|\theta)p(\theta) d\theta}{p(x) \cdot p(y)} \\ &= \int_{\theta \in \Theta} \frac{p(\theta|x)p(\theta|y)}{p(\theta)} d\theta, \end{aligned}$$

where the last equation uses Bayes' Law.  $\square$

**Definition A.5** (Exponential family [21]). *A probability density function or probability mass function  $p(\mathbf{x}|\theta)$ , for  $\mathbf{x} = (x_1, \dots, x_n) \in \mathcal{X}^n$  and  $\theta \in \Theta \subseteq \mathbb{R}^m$  is said to be in the exponential family in canonical form if it is of the form*

$$p(\mathbf{x}|\theta) = h(\mathbf{x}) \exp [\theta^T \phi(\mathbf{x}) - A(\theta)] \quad (6)$$

where  $A(\theta) = \log \int_{\mathcal{X}^m} h(\mathbf{x}) \exp [\theta^T \phi(\mathbf{x})]$ . The conjugate prior with parameters  $\nu_0, \bar{\tau}_0$  for  $\theta$  has the form

$$p(\theta) = \mathcal{P}(\theta|\nu_0, \bar{\tau}_0) = g(\nu_0, \bar{\tau}_0) \exp [\nu_0 \theta^T \bar{\tau}_0 - \nu_0 A(\theta)]. \quad (7)$$

Let  $\bar{s} = \frac{1}{n} \sum_{i=1}^n \phi(x_i)$ . Then the posterior of  $\theta$  is of the form

$$\begin{aligned} p(\theta|\mathbf{x}) &\propto \exp [\theta^T (\nu_0 \bar{\tau}_0 + n \bar{s}) - (\nu_0 + n) A(\theta)] \\ &= \mathcal{P}(\theta|\nu_0 + n, \frac{\nu_0 \bar{\tau}_0 + n \bar{s}}{\nu_0 + n}), \end{aligned}$$

where  $\mathcal{P}(\theta|\nu_0 + n, \frac{\nu_0 \bar{\tau}_0 + n \bar{s}}{\nu_0 + n})$  is the conjugate prior with parameters  $\nu_0 + n$  and  $\frac{\nu_0 \bar{\tau}_0 + n \bar{s}}{\nu_0 + n}$ .

**Lemma A.3.** *Let  $\theta$  be the parameters of a pdf in the exponential family. Let  $\mathcal{P}(\theta|\nu, \bar{\tau}) = g(\nu, \bar{\tau}) \exp [\nu \theta^T \bar{\tau} - \nu A(\theta)]$  denote the conjugate prior for  $\theta$  with parameters  $\nu, \bar{\tau}$ . For any three distributions of  $\theta$ ,*

$$\begin{aligned} p_1(\theta) &= \mathcal{P}(\theta|\nu_1, \bar{\tau}_1), \\ p_2(\theta) &= \mathcal{P}(\theta|\nu_2, \bar{\tau}_2), \\ p_0(\theta) &= \mathcal{P}(\theta|\nu_0, \bar{\tau}_0), \end{aligned}$$

we have

$$\int_{\theta \in \Theta} \frac{p_1(\theta)p_2(\theta)}{p_0(\theta)} d\theta = \frac{g(\nu_1, \bar{\tau}_1)g(\nu_2, \bar{\tau}_2)}{g(\nu_0, \bar{\tau}_0)g(\nu_1 + \nu_2 - \nu_0, \frac{\nu_1 \bar{\tau}_1 + \nu_2 \bar{\tau}_2 - \nu_0 \bar{\tau}_0}{\nu_1 + \nu_2 - \nu_0})}.$$

*Proof.* To compute the integral, we first write  $p_1(\theta), p_2(\theta)$  and  $p_3(\theta)$  in full,

$$\begin{aligned} p_1(\theta) &= \mathcal{P}(\theta|\nu_1, \bar{\tau}_1) = g(\nu_1, \bar{\tau}_1) \exp [\nu_1 \theta^T \bar{\tau}_1 - \nu_1 A(\theta)], \\ p_2(\theta) &= \mathcal{P}(\theta|\nu_2, \bar{\tau}_2) = g(\nu_2, \bar{\tau}_2) \exp [\nu_2 \theta^T \bar{\tau}_2 - \nu_2 A(\theta)], \\ p_0(\theta) &= \mathcal{P}(\theta|\nu_0, \bar{\tau}_0) = g(\nu_0, \bar{\tau}_0) \exp [\nu_0 \theta^T \bar{\tau}_0 - \nu_0 A(\theta)]. \end{aligned}$$

Then we have the integral equal to

$$\begin{aligned} &\int_{\theta \in \Theta} \frac{p_1(\theta)p_2(\theta)}{p_0(\theta)} d\theta \\ &= \int_{\theta \in \Theta} \frac{g(\nu_1, \bar{\tau}_1) \exp [\nu_1 \theta^T \bar{\tau}_1 - \nu_1 A(\theta)] g(\nu_2, \bar{\tau}_2) \exp [\nu_2 \theta^T \bar{\tau}_2 - \nu_2 A(\theta)]}{g(\nu_0, \bar{\tau}_0) \exp [\nu_0 \theta^T \bar{\tau}_0 - \nu_0 A(\theta)]} d\theta \\ &= \frac{g(\nu_1, \bar{\tau}_1)g(\nu_2, \bar{\tau}_2)}{g(\nu_0, \bar{\tau}_0)} \int_{\theta \in \Theta} \exp [\theta^T (\nu_1 \bar{\tau}_1 + \nu_2 \bar{\tau}_2 - \nu_0 \bar{\tau}_0) - A(\theta)(\nu_1 + \nu_2 - \nu_0)] d\theta \\ &= \frac{g(\nu_1, \bar{\tau}_1)g(\nu_2, \bar{\tau}_2)}{g(\nu_0, \bar{\tau}_0)} \cdot \frac{1}{g(\nu_1 + \nu_2 - \nu_0, \frac{\nu_1 \bar{\tau}_1 + \nu_2 \bar{\tau}_2 - \nu_0 \bar{\tau}_0}{\nu_1 + \nu_2 - \nu_0})}. \end{aligned}$$

The last equality is because

$$g\left(\nu_1 + \nu_2 - \nu_0, \frac{\nu_1 \bar{\tau}_1 + \nu_2 \bar{\tau}_2 - \nu_0 \bar{\tau}_0}{\nu_1 + \nu_2 - \nu_0}\right) \exp\left[\theta^T(\nu_1 \bar{\tau}_1 + \nu_2 \bar{\tau}_2 - \nu_0 \bar{\tau}_0) - A(\theta)(\nu_1 + \nu_2 - \nu_0)\right]$$

is the pdf

$$p\left(\theta \mid \nu_1 + \nu_2 - \nu_0, \frac{\nu_1 \bar{\tau}_1 + \nu_2 \bar{\tau}_2 - \nu_0 \bar{\tau}_0}{\nu_1 + \nu_2 - \nu_0}\right)$$

and thus has the integral over  $\theta$  equal to 1.  $\square$

## B Missing proof for Lemma 3.1

**Lemma B.1** (Lemma 3.1). *When  $D_1, \dots, D_n$  are independent conditioned on  $\theta$ , for any  $(D_1, \dots, D_n)$  and  $(\tilde{D}_1, \dots, \tilde{D}_n)$ , if  $p(\theta \mid D_i) = p(\theta \mid \tilde{D}_i) \forall i$ , then  $p(\theta \mid D_1, \dots, D_n) = p(\theta \mid \tilde{D}_1, \dots, \tilde{D}_n)$ .*

*Proof.* Suppose  $\forall i, p(\theta \mid D_i) = p(\theta \mid D'_i)$ , then we have

$$\begin{aligned} p(\theta \mid D_1, D_2, \dots, D_n) &= \frac{p(D_1, D_2, \dots, D_n, \theta)}{p(D_1, D_2, \dots, D_n)} \\ &= \frac{p(D_1, D_2, \dots, D_n \mid \theta) \cdot p(\theta)}{p(D_1, D_2, \dots, D_n)} \\ &= \frac{p(D_1 \mid \theta) \cdot p(D_2 \mid \theta) \cdots p(D_n \mid \theta) \cdot p(\theta)}{p(D_1, D_2, \dots, D_n)} \\ &= \frac{p(D_1, \theta) \cdot p(D_2, \theta) \cdots p(D_n, \theta) \cdot p(\theta)}{p(D_1, D_2, \dots, D_n) \cdot p^n(\theta)} \\ &= \frac{p(\theta \mid D_1) \cdot p(\theta \mid D_2) \cdots p(\theta \mid D_n) \cdot p(D_1) \cdot p(D_2) \cdots p(D_n)}{p(D_1, D_2, \dots, D_n) \cdot p^{n-1}(\theta)} \\ &\propto \frac{p(\theta \mid D_1) \cdot p(\theta \mid D_2) \cdots p(\theta \mid D_n)}{p^{n-1}(\theta)}. \end{aligned}$$

Similarly, we have

$$p(\theta \mid D'_1, D'_2, \dots, D'_n) \propto \frac{p(\theta \mid D'_1) \cdot p(\theta \mid D'_2) \cdots p(\theta \mid D'_n)}{p^{n-1}(\theta)},$$

since the analyst calculate the posterior by normalize the terms, we have

$$p(\theta \mid D_1, D_2, \dots, D_n) = p(\theta \mid D'_1, D'_2, \dots, D'_n). \quad \square$$

## C One-time data acquisition

### C.1 An example of applying peer prediction

The mechanism is as follows.

---

**Mechanism 3:** One-time data collecting mechanism by using Brier Score.

---

- (1) Ask all data providers to report their datasets  $\tilde{D}_1, \dots, \tilde{D}_n$ .
  - (2) For all  $D_{-i}$ , calculate probability  $p(D_{-i} \mid D_i)$  by the reported  $D_i$  and  $p(D_i \mid \theta)$ .
  - (3) The Brier score for agent  $i$  is  $s_i = 1 - \frac{1}{|D_{-i}|} \sum_{D_{-i}} (p(D_{-i} \mid \tilde{D}_i) - \mathbb{I}[D_{-i} = \tilde{D}_{-i}])^2$ ,  
where  $\mathbb{I}[D_{-i} = \tilde{D}_{-i}] = 1$  if  $D_{-i}$  is the same as the reported  $\tilde{D}_{-i}$  and 0 otherwise.
  - (4) The final payment for agent  $i$  is  $r_i = \frac{B \cdot s_i}{n}$ .
- 

This payment function is actually the mean square error of the reported distribution on  $D_{-i}$ . It is based on the Brier score which is first proposed in [3] and is a well-known bounded proper scoring rule. The payments of the mechanism are always bounded between 0 and 1.

**Theorem C.1.** *Mechanism 3 is IR, truthful, budget feasible, symmetric.*

*Proof.* The symmetric property is easy to verify. Moreover, since the payment for each agent is in the interval  $[0, 1]$ , the mechanism is then budget feasible and IR. We only need to prove the truthfulness. Suppose that all the other agents except  $i$  reports truthfully. Agent  $i$  has true dataset  $D_i$  and reports  $\tilde{D}_i$ . Since in the setting, the analyst is able to calculate  $p(D_{-i}|D_i)$ , then if the agent receives  $s_i$  as their payment, from agent  $i$ 's perspective, his expected revenue is then:

$$\begin{aligned} Rev'_i &= \sum_{D_{-i}} p(D_{-i}|D_i) \cdot \left( 1 - \sum_{D'_{-i}} (p(D'_{-i}|\tilde{D}_i) - \mathbb{I}[D'_{-i} = D_{-i}])^2 \right) \\ &= - \sum_{D_{-i}} p(D_{-i}|D_i) \left( \sum_{D'_{-i}} (p(D'_{-i}|\tilde{D}_i)^2) - 2p(D_{-i}|\tilde{D}_i) \right) \\ &= \sum_{D_{-i}} \left( -p(D_{-i}|\tilde{D}_i)^2 + 2p(D_{-i}|\tilde{D}_i)p(D_{-i}|D_i) \right) \end{aligned}$$

Since the function  $-x^2 + 2ax$  is maximized when  $x = a$ , the revenue  $Rev'_i$  is maximized when  $\forall D_{-i}, p(D_{-i}|D_{-i}) = p(D_{-i}|D_i)$ . Since the real payment  $r_i$  is a linear transformation of  $s_i$  and the coefficients are independent of the reported datasets, reporting the dataset with the true posterior will still maximize the agent's revenue and the mechanism is truthful.  $\square$

## C.2 Bounding log-PMI: discrete case

In this section, we give a method to compute the bounds of the log-PMI score when  $|\Theta|$  is finite. First we give the upper bound of the PMI. We have for any  $i, D_i \in \mathbb{D}_i(D_{-i})$

$$\begin{aligned} PMI(D_i, D_{-i}) &\leq \max_{i, D'_{-i}, D'_i \in \mathbb{D}_i(D'_{-i})} \{PMI(D'_i, D'_{-i})\} \\ &= \max_{i, D'_{-i}, D'_i \in \mathbb{D}_i(D'_{-i})} \left\{ \sum_{\theta \in \Theta} \frac{p(\theta|D'_i)p(\theta|D'_{-i})}{p(\theta)} \right\} \\ &\leq \max_{i, D'_i} \left\{ \sum_{\theta \in \Theta} \frac{p(\theta|D'_i)}{\min_{\theta} \{p(\theta)\}} \right\} \\ &\leq \frac{1}{\min_{\theta} \{p(\theta)\}}. \end{aligned}$$

The last inequality is because we have  $\sum_{\theta} p(\theta|D'_i) = 1$ .

Since we have assumed that  $p(\theta)$  is positive, the term  $\frac{1}{\min_{\theta} \{p(\theta)\}}$  could then be computed and is finite. Thus we just let  $R$  be  $\log\left(\frac{1}{\min_{\theta} \{p(\theta)\}}\right)$ . Then we need to calculate a lower bound of the score. We have for any  $i, D_{-i}$  and  $D_i \in \mathbb{D}_i(D_{-i})$

$$PMI(D_i, D_{-i}) = \sum_{\theta \in \Theta} \frac{p(\theta|D_i)p(\theta|D_{-i})}{p(\theta)} \geq \sum_{\theta \in \Theta} p(\theta|D_i)p(\theta|D_{-i}). \quad (8)$$

**Claim C.1.** *Let  $D = \{d^{(1)}, \dots, d^{(N)}\}$  be a dataset with  $N$  data points that are i.i.d. conditioning on  $\theta$ . Let  $\mathcal{D}$  be the support of the data points  $d$ . Define*

$$T = \frac{\max_{\theta \in \Theta} p(\theta)}{\min_{\theta \in \Theta} p(\theta)}, \quad U(\mathcal{D}) = \max_{\theta \in \Theta, d \in \mathcal{D}} p(\theta|d) \Big/ \min_{\theta \in \Theta, d \in \mathcal{D}: p(\theta|d) > 0} p(\theta|d),$$

Then we have

$$\frac{\max_{\theta \in \Theta} p(\theta|D)}{\min_{\theta: p(\theta|D) > 0} p(\theta|D)} \leq U(\mathcal{D})^N \cdot T^{N-1}.$$

*Proof.* By Lemma 3.1, we have

$$p(\boldsymbol{\theta}|D) \propto \frac{\prod_j p(\boldsymbol{\theta}|d^{(j)})}{p(\boldsymbol{\theta})^{N-1}},$$

for a fixed  $D$ , it must hold that

$$\frac{\max_{\boldsymbol{\theta} \in \Theta} p(\boldsymbol{\theta}|D)}{\min_{\boldsymbol{\theta}: p(\boldsymbol{\theta}|D) > 0} p(\boldsymbol{\theta}|D)} \leq U(\mathcal{D})^N \cdot T^{N-1}.$$

□

**Claim C.2.** For any two datasets  $D_i$  and  $D_j$  with  $N_i$  and  $N_j$  data points respectively, let  $\mathcal{D}_i$  be the support of the data points in  $D_i$  and let  $\mathcal{D}_j$  be the support of the data points in  $D_j$ . Then

$$\frac{\max_{\boldsymbol{\theta} \in \Theta} p(\boldsymbol{\theta}|D_i, D_j)}{\min_{\boldsymbol{\theta}: p(\boldsymbol{\theta}|D_i, D_j) > 0} p(\boldsymbol{\theta}|D_i, D_j)} \leq U(\mathcal{D}_i)^{N_i} \cdot U(\mathcal{D}_j)^{N_j} \cdot T^{N_i+N_j-1}.$$

*Proof.* Again by Lemma 3.1, we have

$$p(\boldsymbol{\theta}|D_i, D_j) \propto \frac{p(\boldsymbol{\theta}|D_i)p(\boldsymbol{\theta}|D_j)}{p(\boldsymbol{\theta})}.$$

Combine it with Claim C.1, we prove the statement. □

Then for any  $D_i$ , since  $\sum_{\boldsymbol{\theta} \in \Theta} p(\boldsymbol{\theta}|D_i) = 1$ , by Claim C.1,

$$\min_{\boldsymbol{\theta}: p(\boldsymbol{\theta}|D_i) > 0} p(\boldsymbol{\theta}|D_i) \geq \frac{1}{1 + |\Theta| \cdot U(\mathcal{D}_i)^{N_i} \cdot T^{N_i-1}} \triangleq \eta(\mathcal{D}_i, N_i).$$

And for any  $D_{-i}$ , since  $\sum_{\boldsymbol{\theta} \in \Theta} p(\boldsymbol{\theta}|D_{-i}) = 1$ , by Claim C.2,

$$\min_{\boldsymbol{\theta}: p(\boldsymbol{\theta}|D_{-i}) > 0} p(\boldsymbol{\theta}|D_{-i}) \geq \frac{1}{1 + |\Theta| \cdot \prod_{j \neq i} U(\mathcal{D}_j)^{N_j} \cdot T^{\sum_{j \neq i} N_j - 1}} \triangleq \eta(\mathcal{D}_{-i}, N_{-i}).$$

Finally, for any  $i$ ,  $D_{-i}$ , and  $D_i \in \mathbb{D}_i(D_{-i})$ , according to (8),

$$PMI(D_i, D_{-i}) \geq \sum_{\boldsymbol{\theta} \in \Theta} p(\boldsymbol{\theta}|D_i)p(\boldsymbol{\theta}|D_{-i}) \geq \eta(\mathcal{D}_i, N_i) \cdot \eta(\mathcal{D}_{-i}, N_{-i}).$$

The last inequality is because  $D_i \in \mathbb{D}_i(D_{-i})$  and there must exists  $\boldsymbol{\theta} \in \Theta$  so that both  $p(\boldsymbol{\theta}|D_i)$  and  $p(\boldsymbol{\theta}|D_{-i})$  are non-zero. Both  $\eta(\mathcal{D}_i, N_i)$  and  $\eta(\mathcal{D}_{-i}, N_{-i})$  can be computed in polynomial time. Take minimum over  $i$ , we find the lower bound for PMI.

### C.3 Bounding log-PMI: continuous case

Consider estimating the mean  $\mu$  of a univariate Gaussian  $\mathcal{N}(x|\mu, \sigma^2)$  with known variance  $\sigma^2$ . Let  $D = \{x_1, \dots, x_N\}$  be the dataset and denote the mean by  $\bar{x} = \frac{1}{N} \sum_j x_j$ . We use the Gaussian conjugate prior,

$$\mu \sim \mathcal{N}(\mu|\mu_0, \sigma_0^2).$$

Then according to [20], the posterior of  $\mu$  is equal to

$$p(\mu|D) = \mathcal{N}(\mu|\mu_N, \sigma_N^2),$$

where

$$\frac{1}{\sigma_N^2} = \frac{1}{\sigma_0^2} + \frac{N}{\sigma^2}$$

only depends on the number of data points.

By Lemma 4.1, we know that the payment function for exponential family is in the form of

$$PMI(D_i, D_{-i}) = \frac{g(\nu_i, \bar{\boldsymbol{\tau}}_i)g(\nu_{-i}, \bar{\boldsymbol{\tau}}_{-i})}{g(\nu_0, \bar{\boldsymbol{\tau}}_0)g(\nu_i + \nu_{-i} - \nu_0, \frac{\nu_i \bar{\boldsymbol{\tau}}_i + \nu_{-i} \bar{\boldsymbol{\tau}}_{-i} - \nu_0 \bar{\boldsymbol{\tau}}_0}{\nu_i + \nu_{-i} - \nu_0})}.$$

The normalization term for Gaussian is  $\frac{1}{\sqrt{2\pi\sigma^2}}$ , so we have

$$PMI(D_i, D_{-i}) = \frac{\sqrt{\frac{1}{\sigma_0^2} + \frac{N_i}{\sigma^2}} \sqrt{\frac{1}{\sigma_0^2} + \frac{N_{-i}}{\sigma^2}}}{\sqrt{\frac{1}{\sigma_0^2}} \sqrt{\frac{1}{\sigma_0^2} + \frac{N_i + N_{-i}}{\sigma^2}}}.$$

When the total number of data points has an upper bound  $N_{\max}$ , each of the square root term should be bounded in the interval

$$\left[ \frac{1}{\sigma_0}, \sqrt{\frac{1}{\sigma_0^2} + \frac{N_{\max}}{\sigma^2}} \right]$$

Therefore  $PMI(D_i, D_{-i})$  is bounded in the interval

$$\left[ (1 + N_{\max}\sigma_0^2/\sigma^2)^{-1/2}, 1 + N_{\max}\sigma_0^2/\sigma^2 \right].$$

#### C.4 Sensitivity analysis for the exponential family

If we are estimating the mean  $\mu$  of a univariate Gaussian  $\mathcal{N}(x|\mu, \sigma^2)$  with known variance  $\sigma^2$ . Let  $D = \{x_1, \dots, x_N\}$  be the dataset and denote the mean by  $\bar{x} = \frac{1}{N} \sum_j x_j$ . We use the Gaussian conjugate prior,

$$\mu \sim \mathcal{N}(\mu|\mu_0, \sigma_0^2).$$

Then according to [20], the posterior of  $\mu$  is equal to

$$p(\mu|D) = \mathcal{N}(\mu|\mu_N, \sigma_N^2),$$

where

$$\frac{1}{\sigma_N^2} = \frac{1}{\sigma_0^2} + \frac{N}{\sigma^2}$$

only depends on the number of data points. Since the normalization term  $\frac{1}{\sqrt{2\pi\sigma^2}}$  of Gaussian distributions only depends on the variance, function  $h(\cdot)$  defined in (12)

$$\begin{aligned} h_{D_{-i}}(N_i, \bar{x}_i) &= \frac{g(\nu_i, \bar{\tau}_i)}{g(\nu_i + \nu_{-i} - \nu_0, \frac{\nu_i \bar{\tau}_i + \nu_{-i} \bar{\tau}_{-i} - \nu_0 \bar{\tau}_0}{\nu_i + \nu_{-i} - \nu_0})} \\ &= \sqrt{\frac{1}{\sigma_0^2} + \frac{N_i}{\sigma^2}} \bigg/ \sqrt{\frac{1}{\sigma_0^2} + \frac{N_i + N_{-i}}{\sigma^2}} \end{aligned}$$

will only be changed if the number of data points  $N_i$  changes, which means that the mechanism will be sensitive to replication and withholding, but not necessarily other types of manipulations.

If we are estimating the mean  $\mu$  of a Bernoulli distribution  $Ber(x|\mu)$ . Let  $D = \{x_1, \dots, x_N\}$  be the data points. Denote by  $\alpha = \sum_i x_i$  the number of ones and denote by  $\beta = \sum_i 1 - x_i$  the number of zeros. The conjugate prior is the Beta distribution,

$$p(\mu) = \text{Beta}(\mu|\alpha_0, \beta_0) = \frac{1}{B(\alpha_0, \beta_0)} \mu^{\alpha_0-1} (1 - \mu)^{\beta_0-1}.$$

where  $B(\alpha_0, \beta_0)$  is the Beta function

$$B(\alpha_0, \beta_0) = \frac{(\alpha_0 + \beta_0 - 1)!}{(\alpha_0 - 1)! (\beta_0 - 1)!}.$$

The posterior of  $\mu$  is equal to

$$p(\mu|D) = \text{Beta}(\mu|\alpha_0 + \alpha, \beta_0 + \beta).$$

Then we have

$$\begin{aligned} h_{D_{-i}}(\alpha, \beta) &= \frac{B(\alpha_0 + \alpha_i + \alpha_{-i}, \beta_0 + \beta_i + \beta_{-i})}{B(\alpha_0 + \alpha_i, \beta_0 + \beta_i)} \\ &= \frac{(\alpha_0 + \beta_0 + N_i + N_{-i} - 1)! (\alpha_0 + \alpha_i - 1)! (\beta_0 + \beta_i - 1)!}{(\alpha_0 + \alpha_i + \alpha_{-i} - 1)! (\beta_0 + \beta_i + \beta_{-i} - 1)! (\alpha_0 + \beta_0 + N_i - 1)!}. \end{aligned}$$

Define  $A_i = \alpha_0 + \alpha_i - 1$  and  $B_i = \beta_0 + \beta_i - 1$ , since  $N_i = \alpha_i + \beta_i$  and  $N_{-i} = \alpha_{-i} + \beta_{-i}$ , we have

$$h_{D_{-i}}(\alpha, \beta) = h_{\alpha_{-i}, \beta_{-i}}(A_i, B_i) = \frac{A_i! B_i! (A_i + B_i + \alpha_{-i} + \beta_{-i} + 1)!}{(A_i + \alpha_{-i})! (B_i + \beta_{-i})! (A_i + B_i + 1)!}$$

Now we are going to prove that for any two different pairs  $(A_i, B_i)$  and  $(A'_i, B'_i)$ , there should always exists a pair  $(\alpha'_{-i}, \beta'_{-i})$  selected from the four pairs:  $(\alpha_{-i}, \beta_i)$ ,  $(\alpha_{-i} + 1, \beta_i)$ ,  $(\alpha_{-i}, \beta_i + 1)$ ,  $(\alpha_{-i} + 1, \beta_i + 1)$ , such that  $h_{\alpha'_{-i}, \beta'_{-i}}(A_i, B_i) \neq h_{\alpha'_{-i}, \beta'_{-i}}(A'_i, B'_i)$ .

Suppose that this does not hold, then there should exist two pairs  $(A_i, B_i)$  and  $(A'_i, B'_i)$  such that for each  $(\alpha'_{-i}, \beta'_{-i})$  in the four pairs,  $h_{\alpha'_{-i}, \beta'_{-i}}(A_i, B_i) = h_{\alpha'_{-i}, \beta'_{-i}}(A'_i, B'_i)$ .

Then by the two cases when  $(\alpha'_{-i}, \beta'_{-i}) = (\alpha_{-i}, \beta_{-i})$  and  $(\alpha_{-i} + 1, \beta_{-i})$  we can derive that

$$\begin{aligned} \frac{h_{\alpha_{-i}+1, \beta_{-i}}(A_i, B_i)}{h_{\alpha_{-i}, \beta_{-i}}(A_i, B_i)} &= \frac{h_{\alpha_{-i}+1, \beta_{-i}}(A'_i, B'_i)}{h_{\alpha_{-i}, \beta_{-i}}(A'_i, B'_i)} \\ \frac{A_i + B_i + \alpha_{-i} + 1 + \beta_{-i} + 1}{A_i + \alpha_{-i} + 1} &= \frac{A'_i + B'_i + \alpha_{-i} + 1 + \beta_{-i} + 1}{A'_i + \alpha_{-i} + 1} \\ (A_i + B_i - A'_i - B'_i)(\alpha_{-i} + 1) + (A'_i - A_i)(\alpha_{-i} + \beta_{-i} + 2) + A'_i B_i - A_i B'_i &= 0 \end{aligned}$$

Replacing  $\beta_{-i}$  with  $\beta_{-i} + 1$ , we could get

$$(A_i + B_i - A'_i - B'_i)(\alpha_{-i} + 1) + (A'_i - A_i)(\alpha_{-i} + \beta_{-i} + 3) + A'_i B_i - A_i B'_i = 0$$

Subtracting the last equation from this, we get  $A'_i - A_i = 0$ . Symmetrically, when  $(\alpha'_{-i}, \beta'_{-i}) = (\alpha_{-i}, \beta_{-i})$  and  $(\alpha_{-i}, \beta_{-i} + 1)$  and replacing  $\alpha_{-i}$  with  $\alpha_{-i} + 1$ , we have  $B'_i - B_i = 0$  and thus  $(A_i, B_i) = (A'_i, B'_i)$ . This contradicts to the assumption that  $(A_i, B_i) \neq (A'_i, B'_i)$ . Therefore for any two different pairs of reported data in the Bernoulli setting, at least one in the four others' reported data  $(\alpha_{-i}, \beta_i)$ ,  $(\alpha_{-i} + 1, \beta_i)$ ,  $(\alpha_{-i}, \beta_i + 1)$ ,  $(\alpha_{-i} + 1, \beta_i + 1)$  would make the agent strictly truthfully report his posterior.

## C.5 Missing proofs

### C.5.1 Proof for Theorem 5.1 and Theorem 5.2

**Theorem C.2** (Theorem 5.1). *Mechanism 1 is IR, truthful, budget feasible, symmetric.*

We suppose that the dataset space of agent  $i$  is  $\mathcal{D}_i$ . We first give the definitions of several matrices. These matrices are essential for our proofs, but they are unknown to the data analyst. Since the dataset  $D_i$  consists of  $N_i$  i.i.d data points drawn from the data generating matrix  $G_i$ , we define prediction matrix  $P_i$  of agent  $i$  to be a matrix with  $|\mathcal{D}_i| = |\mathcal{D}|^{N_i}$  rows and  $|\Theta|$  columns. Each column corresponds to a  $\theta \in \Theta$  and each row corresponds to a possible dataset  $D_i \in \mathcal{D}_i$ . The matrix element on the column corresponding to  $\theta$  and the row corresponding to  $D_i$  is  $p(D_i | \theta)$ . Intuitively, this matrix is the posterior of agent  $i$ 's dataset conditioned on the parameter  $\theta$ .

Similarly, we define the out-prediction matrix  $P_{-i}$  of agent  $i$  to be a matrix with  $\prod_{j \neq i} |\mathcal{D}_j|$  rows and  $|\mathcal{Y}|$  columns. Each column corresponds to a  $\theta \in \Theta$  and each row corresponds to a possible dataset  $D_{-i} \in \mathcal{D}_{-i}$ . The element corresponding to  $D_{-i}$  and  $\theta$  is  $p(D_{-i} | \theta)$ . In the proof, we also give a lower bound on the sensitiveness coefficient  $\alpha$  related to these out-prediction matrices.

**Theorem C.3** (Theorem 5.2). *Mechanism 1 is sensitive if either condition holds:*

1.  $\forall i, Q_{-i}$  has rank  $|\Theta|$ .
2.  $\forall i, \sum_{i' \neq i} (\text{rank}_k(G_{i'}) - 1) \cdot N_{i'} + 1 \geq |\Theta|$ .

Moreover, it is  $e_i \cdot \frac{B}{n(R-L)}$ -sensitive for agent  $i$ , where  $e_i$  is the smallest singular value of matrix  $P_{-i}$ .

*Proof.* First, it is easy to verify that the mechanism is budget feasible because  $s_i$  is bounded between  $L$  and  $R$ . Let agent  $i$ 's expected revenue of Mechanism 1 be  $Rev_i$ . Then we have

$$Rev_i = \frac{B}{n} \cdot \left( \frac{\sum_{D_{-i} \in \mathbb{D}_i(D_{-i})} p(D_{-i} | D_i) \cdot \log PMI(\tilde{D}_i, D_{-i}) - L}{R - L} \right).$$

We consider another revenue  $Rev'_i \triangleq \sum_{D_{-i}} p(D_{-i}|D_i) \cdot \log \left( \sum_{\theta} \frac{p(\theta|\tilde{D}_i) \cdot p(\theta|D_{-i})}{p(\theta)} \right)$  assuming that  $0 \cdot \log 0 = 0$ . Then we have

$$\begin{aligned}
Rev'_i &= \sum_{D_{-i}} p(D_{-i}|D_i) \cdot \log \left( \sum_{\theta} \frac{p(\theta|\tilde{D}_i) \cdot p(\theta|D_{-i})}{p(\theta)} \right) \\
&= \sum_{D_{-i}, D_i \in \mathbb{D}_i(D_{-i})} p(D_{-i}|D_i) \cdot \log PMI(\tilde{D}_i, D_{-i}) \\
&\quad + \sum_{D_{-i}, D_i \notin \mathbb{D}_i(D_{-i})} p(D_{-i}|D_i) \cdot \log PMI(\tilde{D}_i, D_{-i}) \\
&= \sum_{D_{-i}, D_i \in \mathbb{D}_i(D_{-i})} p(D_{-i}|D_i) \cdot \log PMI(\tilde{D}_i, D_{-i}) + \sum_{D_{-i}, D_i \notin \mathbb{D}_i(D_{-i})} 0 \cdot \log 0 \\
&= \sum_{D_{-i}, D_i \in \mathbb{D}_i(D_{-i})} p(D_{-i}|D_i) \cdot \log PMI(\tilde{D}_i, D_{-i}) \\
&= Rev_i \cdot \frac{n}{B} \cdot (R - L) + L.
\end{aligned}$$

$Rev'_i$  is a linear transformation of  $Rev_i$ . The coefficients  $L$ ,  $R$ ,  $\frac{n}{B}$  do not depend on  $\tilde{D}_i$ . The ratio  $\frac{n}{B} \cdot (R - L)$  is larger than 0. Therefore, the optimal reported  $\tilde{D}_i$  for  $Rev_i$  should be the same as that for  $Rev'_i$ . If the a payment rule with revenue  $Rev'_i$  is  $e_i$ -sensitive for agent  $i$ , then the Mechanism 1 would then be  $e_i \cdot \frac{B}{n \cdot (R-L)}$ -sensitive. In the following part, we prove that real dataset  $D_i$  would maximize the revenue  $Rev'_i$  and the  $Rev'_i$  is  $e_i \cdot \frac{B}{|\mathcal{N}| \cdot (R-L)}$ -sensitive for all the agents. Thus in the following parts we prove the revenue  $Rev'_i$  is  $e_i$ -sensitive for agent  $i$ .

$$\begin{aligned}
Rev'_i &= \sum_{D_{-i}} p(D_{-i}|D_i) \cdot \log \left( \sum_{\theta} \frac{p(\theta|\tilde{D}_i) \cdot p(\theta|D_{-i})}{p(\theta)} \right) \\
&= \sum_{D_{-i}} p(D_{-i}|D_i) \cdot \log \left( \sum_{\theta} \frac{p(\theta|\tilde{D}_i) \cdot p(\theta, D_{-i})}{p(\theta)} \right) - \sum_{D_{-i}} p(D_{-i}|D_i) \cdot \log(p(D_{-i})) \\
&= \sum_{D_{-i}} p(D_{-i}|D_i) \cdot \log \left( \sum_{\theta} \frac{p(\theta|\tilde{D}_i) \cdot p(\theta, D_{-i})}{p(\theta)} \right) - C.
\end{aligned}$$

Since the term  $\sum_{D_{-i}} p(D_{-i}|D_i) \cdot \log(p(D_{-i}))$  does not depend on  $\tilde{D}_i$ , agent  $i$  could only manipulate to modify the term  $\sum_{D_{-i}} p(D_{-i}|D_i) \cdot \log \left( \sum_{\theta} \frac{p(\theta|\tilde{D}_i) \cdot p(\theta, D_{-i})}{p(\theta)} \right)$ . Since we have

$$\begin{aligned}
\sum_{D_{-i}, \theta} \frac{p(\theta|\tilde{D}_i) \cdot p(\theta, D_{-i})}{p(\theta)} &= \sum_{\theta} \frac{1}{p(\theta)} \left( \sum_{D_{-i}} p(\theta|\tilde{D}_i) \cdot p(\theta, D_{-i}) \right) \\
&= \sum_{\theta} \frac{1}{p(\theta)} \left( p(\theta|\tilde{D}_i) \cdot p(\theta) \right) \\
&= \sum_{\theta} p(\theta|\tilde{D}_i) \\
&= 1,
\end{aligned}$$

Since we have  $\sum_{D_{-i}} \left( \sum_{\theta} \frac{p(\theta|\tilde{D}_i) \cdot p(\theta, D_{-i})}{p(\theta)} \right) = 1$ , we could view the term  $\sum_{\theta} \frac{p(\theta|\tilde{D}_i) \cdot p(\theta, D_{-i})}{p(\theta)}$  as a probability distribution on the variable  $D_{-i}$ . Since it depends on  $\tilde{D}_i$ , we denote it as  $\tilde{p}(D_{-i}|\tilde{D}_i)$ . Since if we fix a distributions  $p(\sigma)$ , then the distribution  $q(\sigma)$  that maximizes  $\sum_{\sigma} p(\sigma) \log q(\sigma)$  should be the same as  $p$ . (If we assume that  $0 \cdot \log 0 = 0$ , this still holds.) When agent  $i$  report



truthfully,

$$\begin{aligned}
\sum_{\theta} \frac{p(\theta|D_i) \cdot p(\theta, D_{-i})}{p(\theta)} &= \sum_{\theta} \frac{p(D_i, \theta) \cdot p(D_{-i}, \theta)}{p(D_i) \cdot p(\theta)} \\
&= \sum_{\theta} \frac{p(D_i|\theta) \cdot p(D_{-i}, \theta)}{p(D_i)} \\
&= \sum_{\theta} \frac{p(D_i|\theta) \cdot p(D_{-i}|\theta) \cdot p(\theta)}{p(D_i)} \\
&= \sum_{\theta} \frac{p(D_i, D_{-i}, \theta)}{p(D_i)} \\
&= p(D_{-i}|D_i).
\end{aligned}$$

The data provider can always maximize  $Rev'_i$  by truthfully reporting  $D_i$ . And we have proven the truthfulness of the mechanism.

Then we need to prove the relation between the sensitiveness of the mechanism and the out-prediction matrices. When Alice reports  $\tilde{D}_i$  the revenue difference from truthfully report is then

$$\begin{aligned}
\Delta_{Rev'_i} &= \sum_{D_{-i}} p(D_{-i}|D_i) \log p(D_{-i}|D_i) - \sum_{D_{-i}} p(D_{-i}|D_i) \log \tilde{p}(D_{-i}|D_i) \\
&= \sum_{D_{-i}} p(D_{-i}|D_i) \log \frac{p(D_{-i}|D_i)}{\tilde{p}(D_{-i}|D_i)} \\
&= D_{KL}(p||\tilde{p}) \\
&\geq \sum_{D_{-i}} \|p(D_{-i}|D_i) - \tilde{p}(D_{-i}|D_i)\|^2.
\end{aligned}$$

We let the distribution difference vector be  $\Delta_i$  (Note that here  $\Delta_i$  is a  $|\Theta|$ -dimension vector), then we have

$$\begin{aligned}
\Delta_{Rev'_i} &\geq \sum_{D_{-i}} |p(D_{-i}|D_i) - \tilde{p}(D_{-i}|D_i)|^2 \geq \sum_{D_{-i}} \left\| \sum_{\theta} (p(\theta|D_i) - \tilde{p}(\theta|D_i)) \cdot p(D_{-i}|\theta) \right\|^2 \\
&= \|P_{-i}\Delta_i\|^2.
\end{aligned}$$

Since  $e_i$  is the minimum singular value of  $P_{-i}$  and thus  $P_{-i}^T P_{-i} - e_i I$  is semi-positive, we have

$$\begin{aligned}
\|P_{-i}\Delta_i\|^2 &= \Delta_i^T P_{-i}^T P_{-i} \Delta_i \\
&= \Delta_i^T (P_{-i}^T P_{-i} - e_i I) \Delta_i + \Delta_i^T e_i I \Delta_i \\
&\geq \Delta_i^T e_i I \Delta_i \\
&\geq e_i \Delta_i^T \Delta_i \\
&= \|\Delta_i\| \cdot e_i.
\end{aligned}$$

Finally get the payment rule with revenue  $Rev'_i$  is  $e_i$ -sensitive for agent  $i$ . If all  $P_{-i}$  has rank  $|\Theta|$ , then all the singular values of the matrix  $P_{-i}$  should have positive singular values and for all  $i$ ,  $e_i > 0$ . By now we have proven that if all the  $P_{-i}$  has rank  $|\Theta|$ , then the mechanism is sensitive. Since  $p(\theta|D_i) = p(D_i|\theta) \cdot \frac{p(\theta)}{p(D_i)}$ , we have the matrix equation:

$$Q_{-i} = \Lambda^{D_i^{-1}} \cdot P_{-i} \cdot \Lambda^\theta,$$

$$\text{where } \Lambda^{D_i^{-1}} = \begin{bmatrix} \frac{1}{p(D_i^1)} & & & \\ & \frac{1}{p(D_i^2)} & & \\ & & \ddots & \\ & & & \frac{1}{p(D_i^{|\mathcal{D}_i|})} \end{bmatrix} \text{ and } \Lambda^\theta = \begin{bmatrix} p(\theta_1) & & & \\ & p(\theta_2) & & \\ & & \ddots & \\ & & & p(\theta_{|\Theta|}) \end{bmatrix}.$$

$p(D_i^j)$  is the probability that agent  $i$  gets the dataset  $D_i^j$ .  $p(\theta_k)$  is the probability of the prior of the

parameter  $\theta$  with index  $k$ . Both are all diagonal matrices. Both of the diagonal matrices well-defined and full-rank. Thus the rank of  $P_{-i}$  should be the same as  $Q_{-i}$  and we have proved the first condition.

The proof for the second sufficient condition is directly derived from the paper [27] and the condition 1. We first define a matrix  $G'_i$  with the same size as  $G_i$  while its elements are  $p(d_i|\theta)$  rather than  $p(\theta|d_i)$ . Since for all  $i' \in [n]$  the prediction matrix  $P_{i'}$  is the columnwise Kronecker product (defined in Lemma 1 in [27] which is shown below) of  $N_{i'}$  data generating matrices. By using the following Lemma in [27], if the k-rank of  $G'_{i'}$  is  $r$ , then each time we multiply (columnwise Kronecker product) a matrix by  $G'_{i'}$ , the k-rank would increase by at least  $\text{rank}_k(G'_{i'}) - 1$ , or reach the cap of  $|\Theta|$ .

**Lemma C.1.** Consider two matrices  $\mathbf{A} = [\mathbf{a}_1, \mathbf{a}_2, \dots, \mathbf{a}_F] \in \mathbb{R}^{I \times F}$ ,  $\mathbf{B} = [\mathbf{b}_1, \mathbf{b}_2, \dots, \mathbf{b}_F] \in \mathbb{R}^{J \times F}$  and  $\mathbf{A} \odot_c \mathbf{B}$  is the columnwise Krocnecker product of  $\mathbf{A}$  and  $\mathbf{B}$  defined as:

$$\mathbf{A} \odot_c \mathbf{B} \triangleq [\mathbf{a}_1 \otimes \mathbf{b}_1, \mathbf{a}_2 \otimes \mathbf{b}_2, \dots, \mathbf{a}_F \otimes \mathbf{b}_F],$$

where  $\otimes$  stands for the Kronecker product. It holds that

$$\text{rank}_k(\mathbf{A} \odot_c \mathbf{B}) \geq \min\{\text{rank}_k(\mathbf{A}) + \text{rank}_k(\mathbf{B}) - 1, F\}.$$

Therefore the final k-rank of the  $N_{i'}$  would be no less than  $\min\{N_i \cdot (r - 1) + 1, |\Theta|\}$ . We then need to calculate the k-rank of the out-prediction matrix of each agent  $i$  and verify whether it is  $|\Theta|$ . Similarly, the out-prediction matrix of agent  $i$  is the columnwise Kronecker product of all the other agent's prediction matrices. By the same lower bound tool in [27], the k-rank of  $P_{-i}$  should be at least  $\min\{\sum_{i' \neq i} (\text{rank}_k(G'_{i'}) - 1) \cdot N_{i'} + 1, |\Theta|\}$  and by Theorem 5.2, if the k-rank of all prediction matrices are all  $|\Theta|$ , Mechanism 1 should be sensitive.  $\square$

### C.5.2 Missing Proof for Theorem 5.3

When  $\Theta \subseteq \mathbb{R}^m$  and a model in the exponential family is used, we prove that the mechanism will be sensitive if and only if for any  $(\nu'_i, \bar{\tau}'_i) \neq (\nu_i, \bar{\tau}_i)$ ,

$$\Pr_{D_{-i}} [h_{D_{-i}}(\nu'_i, \bar{\tau}'_i) \neq h_{D_{-i}}(\nu_i, \bar{\tau}_i)] > 0. \quad (9)$$

We first show that the above condition is equivalent to that for any  $(\nu'_i, \bar{\tau}'_i) \neq (\nu_i, \bar{\tau}_i)$ ,

$$\Pr_{D_{-i}|D_i} [h_{D_{-i}}(\nu'_i, \bar{\tau}'_i) \neq h_{D_{-i}}(\nu_i, \bar{\tau}_i)] > 0, \quad (10)$$

where  $D_{-i}$  is drawn from  $p(D_{-i}|D_i)$  but not  $p(D_{-i})$ . This is because, by conditional independence of the datasets, for any event  $\mathcal{E}$ , we have

$$\Pr_{D_{-i}|D_i} [\mathcal{E}] = \int_{\theta \in \Theta} p(\theta|D_i) \Pr_{D_{-i}|\theta} [\mathcal{E}] d\theta$$

and

$$\Pr_{D_{-i}} [\mathcal{E}] = \int_{\theta \in \Theta} p(\theta) \Pr_{D_{-i}|\theta} [\mathcal{E}] d\theta.$$

Since both  $p(\theta)$  and  $p(\theta|D_i)$  are always positive because they are in exponential family, it should hold that

$$\Pr_{D_{-i}|D_i} [\mathcal{E}] > 0 \iff \Pr_{D_{-i}} [\mathcal{E}] > 0.$$

Therefore (9) is equivalent to (10), and we only need to show that the mechanism is sensitive if and only if (10) holds.

When we're using a (canonical) model in exponential family, the prior  $p(\theta)$  and the posteriors  $p(\theta|D_i), p(\theta|D_{-i})$  can be represented in the standard form (7),

$$\begin{aligned} p(\theta) &= \mathcal{P}(\theta|\nu_0, \bar{\tau}_0), \\ p(\theta|D_i) &= \mathcal{P}(\theta|\nu_i, \bar{\tau}_i), \\ p(\theta|D_{-i}) &= \mathcal{P}(\theta|\nu_{-i}, \bar{\tau}_{-i}), \\ p(\theta|\tilde{D}_i) &= \mathcal{P}(\theta|\nu'_i, \bar{\tau}'_i), \end{aligned}$$

where  $\nu_0, \bar{\tau}_0$  are the parameters for the prior  $p(\boldsymbol{\theta})$ ,  $\nu_i, \bar{\tau}_i$  are the parameters for the posterior  $p(\boldsymbol{\theta}|D_i)$ ,  $\nu_{-i}, \bar{\tau}_{-i}$  are the parameters for the posterior  $p(\boldsymbol{\theta}|D_{-i})$ , and  $\nu'_i, \bar{\tau}'_i$  are the parameters for  $p(\boldsymbol{\theta}|\tilde{D}_i)$ .

From the proof for Theorem 5.1, we know that the difference between the expected score of reporting  $D_i$  and the expected score of reporting  $\tilde{D}_i \neq D_i$  is equal to

$$\Delta_{Rev} = D_{KL}(p(D_{-i}|D_i)||p(D_{-i}|\tilde{D}_i)).$$

Therefore if  $p(D_{-i}|\tilde{D}_i)$  differs from  $p(D_{-i}|D_i)$  with non-zero probability, that is,

$$\Pr_{D_{-i}|D_i} [p(D_{-i}|D_i) \neq p(D_{-i}|\tilde{D}_i)] > 0, \quad (11)$$

then  $\Delta_{Rev} > 0$ . By Lemma A.2 and Lemma A.3,

$$p(D_{-i}|D_i) = \int_{\boldsymbol{\theta} \in \Theta} \frac{p(\boldsymbol{\theta}|D_i)p(\boldsymbol{\theta}|D_{-i})}{p(\boldsymbol{\theta})} d\boldsymbol{\theta} = \frac{g(\nu_i, \bar{\tau}_i)g(\nu_{-i}, \bar{\tau}_{-i})}{g(\nu_0, \bar{\tau}_0)g(\nu_i + \nu_{-i} - \nu_0, \frac{\nu_i \bar{\tau}_i + \nu_{-i} \bar{\tau}_{-i} - \nu_0 \bar{\tau}_0}{\nu_i + \nu_{-i} - \nu_0})},$$

$$p(D_{-i}|\tilde{D}_i) = \int_{\boldsymbol{\theta} \in \Theta} \frac{p(\boldsymbol{\theta}|\tilde{D}_i)p(\boldsymbol{\theta}|D_{-i})}{p(\boldsymbol{\theta})} d\boldsymbol{\theta} = \frac{g(\nu'_i, \bar{\tau}'_i)g(\nu_{-i}, \bar{\tau}_{-i})}{g(\nu_0, \bar{\tau}_0)g(\nu'_i + \nu_{-i} - \nu_0, \frac{\nu'_i \bar{\tau}'_i + \nu_{-i} \bar{\tau}_{-i} - \nu_0 \bar{\tau}_0}{\nu'_i + \nu_{-i} - \nu_0})}.$$

Therefore (11) is equivalent to

$$\Pr_{D_{-i}|D_i} [h_{D_{-i}}(\nu_i, \bar{\tau}_i) \neq h_{D_{-i}}(\nu'_i, \bar{\tau}'_i)] > 0.$$

Therefore if for all  $(\nu'_i, \bar{\tau}'_i) \neq (\nu_i, \bar{\tau}_i)$ , we have

$$\Pr_{D_{-i}|D_i} [h_{D_{-i}}(\nu_i, \bar{\tau}_i) \neq h_{D_{-i}}(\nu'_i, \bar{\tau}'_i)] > 0,$$

then reporting any  $(\nu'_i, \bar{\tau}'_i) \neq (\nu_i, \bar{\tau}_i)$  will lead to a strictly lower expected score, which means the mechanism is sensitive. To prove the other direction, if the above condition does not hold, i.e., there exists  $(\nu'_i, \bar{\tau}'_i) \neq (\nu_i, \bar{\tau}_i)$  with

$$\Pr_{D_{-i}|D_i} [h_{D_{-i}}(\nu'_i, \bar{\tau}'_i) \neq h_{D_{-i}}(\nu_i, \bar{\tau}_i)] = 0,$$

then reporting  $(\nu'_i, \bar{\tau}'_i) \neq (\nu_i, \bar{\tau}_i)$  will give the same expected score as truthfully reporting  $(\nu_i, \bar{\tau}_i)$ , which means that the mechanism is not sensitive.

## D Multiple-time data acquisition

### D.1 Sensitivity analysis

We first give the sensitivity analysis for finite-size  $|\Theta|$ . The results are basically the same as the ones for the one-time data acquisition mechanism except that we do not give a lower bound for  $\alpha$ .

**Theorem D.1.** *When  $|\Theta|$  is finite, if  $f$  is strictly convex, then Mechanism 2 is sensitive in the first  $T - 1$  rounds if either of the following two conditions holds,*

- (1)  $\forall i, Q_{-i}$  has rank  $|\Theta|$ .
- (2)  $\forall i, \sum_{i' \neq i} (\text{rank}_k(G_{i'}) - 1) \cdot N_{i'} + 1 \geq |\Theta|$ .

When  $\Theta \subseteq \mathbb{R}^m$  is a continuous space, the results are entirely similar to the ones for Mechanism 1 but with slightly different proofs.

Suppose the data analyst uses a model from the exponential family so that the prior and all the posterior of  $\boldsymbol{\theta}$  can be written in the form in Lemma 4.1. The sensitivity of the mechanism will depend on the normalization term  $g(\nu, \bar{\tau})$  (or equivalently, the partition function) of the pdf. Define

$$h_{D_{-i}}(\nu_i, \bar{\tau}_i) = \frac{g(\nu_i, \bar{\tau}_i)}{g(\nu_i + \nu_{-i} - \nu_0, \frac{\nu_i \bar{\tau}_i + \nu_{-i} \bar{\tau}_{-i} - \nu_0 \bar{\tau}_0}{\nu_i + \nu_{-i} - \nu_0})}, \quad (12)$$

then we have the following sufficient and necessary conditions for the sensitivity of the mechanism.

**Theorem D.2.** *When  $\Theta \subseteq \mathbb{R}^m$ , if the data analyst uses a model in the exponential family and a strictly convex  $f$ , then Mechanism 2 is sensitive in the first  $T - 1$  rounds if and only if for any  $(\nu'_i, \bar{\tau}'_i) \neq (\nu_i, \bar{\tau}_i)$ , we have  $\Pr_{D_{-i}} [h_{D_{-i}}(\nu'_i, \bar{\tau}'_i) \neq h_{D_{-i}}(\nu_i, \bar{\tau}_i)] > 0$ .*

See Section 5 for interpretations of this theorem.

## D.2 Missing proofs

The following part are the proofs for our results.

**Proof of Theorem 6.1.** It is easy to verify that the mechanism is IR, budget feasible and symmetric. We prove the truthfulness as follows.

Let's look at the payment for day  $t$ . At day  $t$ , data provider  $i$  reports a dataset  $\tilde{D}_i^{(t)}$ . Assuming that all other data providers truthfully report  $D_{-i}^{(t)}$ , data provider  $i$ 's expected payment is decided by his expected score

$$\begin{aligned} & \mathbb{E}_{(D_{-i}^{(t)}, D_{-i}^{(t+1)}) | D_i^{(t)}} [S_i] \\ &= \mathbb{E}_{D_{-i}^{(t+1)}} f' \left( \frac{1}{PMI(\tilde{D}_i^{(t)}, D_{-i}^{(t+1)})} \right) - \mathbb{E}_{D_{-i}^{(t)} | D_i^{(t)}} f^* \left( f' \left( \frac{1}{PMI(\tilde{D}_i^{(t)}, D_{-i}^{(t)})} \right) \right). \end{aligned} \quad (13)$$

The first expectation is taken over the marginal distribution  $p(D_{-i}^{(t+1)})$  without conditioning on  $D_i^{(t)}$  because  $D_{-i}^{(t+1)}$  is independent from  $D_i^{(t)}$ , so we have  $p(D_{-i}^{(t+1)} | D_i^{(t)}) = p(D_{-i}^{(t+1)})$ . Since the underlying distributions for different days are the same, we drop the superscripts for simplicity in the rest of the proof, so the expected score is written as

$$\mathbb{E}_{D_{-i}} f' \left( \frac{1}{PMI(\tilde{D}_i, D_{-i})} \right) - \mathbb{E}_{D_{-i} | D_i} f^* \left( f' \left( \frac{1}{PMI(\tilde{D}_i, D_{-i})} \right) \right). \quad (14)$$

We then use Lemma 4.2 to get an upper bound of the expected score (14) and show that truthfully reporting  $D_i$  achieves the upper bound. We apply Lemma 4.2 on two distributions of  $D_{-i}$ , the distribution of  $D_{-i}$  conditioning on the observed  $D_i$ ,  $p(D_{-i} | D_i)$ , and the marginal distribution  $p(D_{-i})$ . Then we get

$$D_f(p(D_{-i} | D_i), p(D_{-i})) \geq \sup_{g \in \mathcal{G}} \mathbb{E}_{D_{-i}} [g(D_{-i})] - \mathbb{E}_{D_{-i} | D_i} [f^*(g(D_{-i}))], \quad (15)$$

where  $f$  is the given convex function,  $\mathcal{G}$  is the set of all real-valued functions of  $D_{-i}$ . The supremum is achieved and only achieved at function  $g$  with

$$g(D_{-i}) = f' \left( \frac{p(D_{-i})}{p(D_{-i} | D_i)} \right) \text{ for all } D_{-i} \text{ with } p(D_{-i} | D_i) > 0. \quad (16)$$

For a dataset  $\tilde{D}_i$ , define function

$$g_{\tilde{D}_i}(D_{-i}) = f' \left( \frac{1}{PMI(\tilde{D}_i, D_{-i})} \right).$$

Then (15) gives an upper bound of the expected score (14) as

$$\begin{aligned} & D_f(p(D_{-i} | D_i), p(D_{-i})) \\ & \geq \mathbb{E}_{D_{-i}} [g_{\tilde{D}_i}(D_{-i})] - \mathbb{E}_{D_{-i} | D_i} [f^*(g_{\tilde{D}_i}(D_{-i}))] \\ & = \mathbb{E}_{D_{-i}} \left[ f' \left( \frac{1}{PMI(\tilde{D}_i, D_{-i})} \right) \right] - \mathbb{E}_{D_{-i} | D_i} \left[ f^* \left( f' \left( \frac{1}{PMI(\tilde{D}_i, D_{-i})} \right) \right) \right] \\ & = (14). \end{aligned}$$

By (16), the upper bound is achieved only when

$$g_{\tilde{D}_i}(D_{-i}) = f' \left( \frac{p(D_{-i})}{p(D_{-i} | D_i)} \right) \text{ for all } D_{-i} \text{ with } p(D_{-i} | D_i) > 0,$$

that is

$$f' \left( \frac{1}{PMI(\tilde{D}_i, D_{-i})} \right) = f' \left( \frac{p(D_{-i})}{p(D_{-i} | D_i)} \right) \text{ for all } D_{-i} \text{ with } p(D_{-i} | D_i) > 0. \quad (17)$$

Then it is easy to prove the truthfulness. Truthfully reporting  $D_i$  achieves (17) because by Lemma A.2, for all  $D_i$  and  $D_{-i}$ ,

$$PMI(D_i, D_{-i}) = \frac{p(D_i, D_{-i})}{p(D_i)p(D_{-i})} = \frac{p(D_{-i}|D_i)}{p(D_{-i})}.$$

Again, let  $\mathbf{Q}_{-i}$  be a  $(\prod_{j \in [n], j \neq i} |\mathcal{D}_j|^{N_j}) \times |\Theta|$  matrix with elements equal to  $p(\boldsymbol{\theta}|D_{-i})$  and let  $G_i$  be the  $|\mathcal{D}_i| \times |\Theta|$  data generating matrix with elements equal to  $p(\boldsymbol{\theta}|d_i)$ . Then we have the following sufficient conditions for the mechanism's sensitivity.

**Proof of Theorem D.1.** We then prove the sensitivity. For discrete and finite-size  $\Theta$ , we prove that when  $f$  is strictly convex and  $\mathbf{Q}_{-i}$  has rank  $|\Theta|$ , the mechanism is sensitive. When  $f$  is strictly convex,  $f'$  is a strictly increasing function. Let  $\tilde{\mathbf{q}}_i = p(\boldsymbol{\theta}|\tilde{D}_i)$ . Then according to the definition of  $PMI(\cdot)$ , condition (17) is equivalent to

$$PMI(\tilde{D}_i, D_{-i}) = \sum_{\boldsymbol{\theta} \in \Theta} \frac{\tilde{\mathbf{q}}_i \cdot p(\boldsymbol{\theta}|D_{-i})}{p(\boldsymbol{\theta})} = \frac{p(D_{-i}|D_i)}{p(D_{-i})} \text{ for all } D_{-i} \text{ with } p(D_{-i}|D_i) > 0. \quad (18)$$

We show that when matrix  $\mathbf{Q}_{-i}$  has rank  $|\Theta|$ ,  $\tilde{\mathbf{q}}_i = p(\boldsymbol{\theta}|D_i)$  is the only solution of (18), which means that the payment rule is sensitive. Then suppose  $\tilde{\mathbf{q}}_i = p(\boldsymbol{\theta}|D_i)$  and  $\tilde{\mathbf{q}}_i = p(\boldsymbol{\theta}|\tilde{D}_i)$  are both solutions of (18), then we should have

$$p(D_{-i}|\tilde{D}_i) = p(D_{-i}|D_i) \text{ for all } D_{-i} \text{ with } p(D_{-i}|D_i) > 0.$$

In addition, because

$$\sum_{D_{-i}} p(D_{-i}|\tilde{D}_i) = 1 = \sum_{D_{-i}} p(D_{-i}|D_i)$$

and  $p(D_{-i}|\tilde{D}_i) \geq 0$ , we must also have  $p(D_{-i}|\tilde{D}_i) = 0$  for all  $D_{-i}$  with  $p(D_{-i}|D_i) = 0$ . Therefore we have

$$PMI(\tilde{D}_i, D_{-i}) = PMI(D_i, D_{-i}) \text{ for all } D_{-i}.$$

Since  $PMI(\cdot)$  can be written as,

$$PMI(\tilde{D}_i, D_{-i}) = \sum_{\boldsymbol{\theta} \in \Theta} \frac{p(\boldsymbol{\theta}|\tilde{D}_i)p(\boldsymbol{\theta}|D_{-i})}{p(\boldsymbol{\theta})} = (\mathbf{Q}_{-i}\boldsymbol{\Lambda}\tilde{\mathbf{q}}_i)_{D_{-i}}$$

where  $\boldsymbol{\Lambda}$  is the  $|\Theta| \times |\Theta|$  diagonal matrix with  $1/p(\boldsymbol{\theta})$  on the diagonal. So we have

$$\mathbf{Q}_{-i}\boldsymbol{\Lambda}p(\boldsymbol{\theta}|D_i) = \mathbf{Q}_{-i}\boldsymbol{\Lambda}\mathbf{q} \implies \mathbf{Q}_{-i}\boldsymbol{\Lambda}(p(\boldsymbol{\theta}|D_i) - \mathbf{q}) = 0.$$

Since  $\mathbf{Q}_{-i}\boldsymbol{\Lambda}$  must have rank  $|\Theta|$ , which means that the columns of  $\mathbf{Q}_{-i}\boldsymbol{\Lambda}$  are linearly independent, we must have

$$p(\boldsymbol{\theta}|D_i) - \mathbf{q} = 0,$$

which completes our proof of sensitivity for finite-size  $\Theta$ . The proof of condition (2) is the same as the proof of Theorem C.3 condition (2).

**Proof of Theorem D.2.** When  $\Theta \subseteq \mathbb{R}^m$  and a model in the exponential family is used, we prove that when  $f$  is strictly convex, the mechanism will be sensitive if and only if for any  $(\nu'_i, \bar{\boldsymbol{\tau}}'_i) \neq (\nu_i, \bar{\boldsymbol{\tau}}_i)$ ,

$$\Pr_{D_{-i}} [h_{D_{-i}}(\nu'_i, \bar{\boldsymbol{\tau}}'_i) \neq h_{D_{-i}}(\nu_i, \bar{\boldsymbol{\tau}}_i)] > 0. \quad (19)$$

We first show that the above condition is equivalent to that for any  $(\nu'_i, \bar{\boldsymbol{\tau}}'_i) \neq (\nu_i, \bar{\boldsymbol{\tau}}_i)$ ,

$$\Pr_{D_{-i}|D_i} [h_{D_{-i}}(\nu'_i, \bar{\boldsymbol{\tau}}'_i) \neq h_{D_{-i}}(\nu_i, \bar{\boldsymbol{\tau}}_i)] > 0, \quad (20)$$

where  $D_{-i}$  is drawn from  $p(D_{-i}|D_i)$  but not  $p(D_{-i})$ . This is because, by conditional independence of the datasets, for any event  $\mathcal{E}$ , we have

$$\Pr_{D_{-i}|D_i} [\mathcal{E}] = \int_{\boldsymbol{\theta} \in \Theta} p(\boldsymbol{\theta}|D_i) \Pr_{D_{-i}|\boldsymbol{\theta}} [\mathcal{E}] d\boldsymbol{\theta}$$

and

$$\Pr_{D_{-i}}[\mathcal{E}] = \int_{\boldsymbol{\theta} \in \Theta} p(\boldsymbol{\theta}) \Pr_{D_{-i}|\boldsymbol{\theta}}[\mathcal{E}] d\boldsymbol{\theta}.$$

Since both  $p(\boldsymbol{\theta})$  and  $p(\boldsymbol{\theta}|D_i)$  are always positive because they are in exponential family, it should hold that

$$\Pr_{D_{-i}|D_i}[\mathcal{E}] > 0 \iff \Pr_{D_{-i}}[\mathcal{E}] > 0.$$

Therefore (19) is equivalent to (20), and we only need to show that the mechanism is sensitive if and only if (20) holds.

Let  $\tilde{\mathbf{q}}_i = p(\boldsymbol{\theta}|\tilde{D}_i)$ . We then again apply Lemma 4.2. By Lemma 4.2 and the strict convexity of  $f$ ,  $\tilde{\mathbf{q}}_i$  achieves the supremum if and only if

$$PMI(\tilde{D}_i, D_{-i}) = \frac{p(D_{-i}|D_i)}{p(D_{-i})} \text{ for all } D_{-i} \text{ with } p(D_{-i}|D_i) > 0.$$

By the definition of  $PMI$  and Lemma A.2, the above condition is equivalent to

$$\int_{\boldsymbol{\theta} \in \Theta} \frac{\tilde{\mathbf{q}}_i(\boldsymbol{\theta})p(\boldsymbol{\theta}|D_{-i})}{p(\boldsymbol{\theta})} d\boldsymbol{\theta} = \int_{\boldsymbol{\theta} \in \Theta} \frac{p(\boldsymbol{\theta}|D_i)p(\boldsymbol{\theta}|D_{-i})}{p(\boldsymbol{\theta})} d\boldsymbol{\theta} \text{ for all } D_{-i} \text{ with } p(D_{-i}|D_i) > 0. \quad (21)$$

When we're using a (canonical) model in exponential family, the prior  $p(\boldsymbol{\theta})$  and the posteriors  $p(\boldsymbol{\theta}|D_i), p(\boldsymbol{\theta}|D_{-i})$  can be represented in the standard form (7),

$$\begin{aligned} p(\boldsymbol{\theta}) &= \mathcal{P}(\boldsymbol{\theta}|\nu_0, \bar{\boldsymbol{\tau}}_0), \\ p(\boldsymbol{\theta}|D_i) &= \mathcal{P}(\boldsymbol{\theta}|\nu_i, \bar{\boldsymbol{\tau}}_i), \\ p(\boldsymbol{\theta}|D_{-i}) &= \mathcal{P}(\boldsymbol{\theta}|\nu_{-i}, \bar{\boldsymbol{\tau}}_{-i}), \\ \tilde{\mathbf{q}}_i &= \mathcal{P}(\boldsymbol{\theta}|\nu'_i, \bar{\boldsymbol{\tau}}'_i), \end{aligned}$$

where  $\nu_0, \bar{\boldsymbol{\tau}}_0$  are the parameters for the prior  $p(\boldsymbol{\theta})$ ,  $\nu_i, \bar{\boldsymbol{\tau}}_i$  are the parameters for the posterior  $p(\boldsymbol{\theta}|D_i)$ ,  $\nu_{-i}, \bar{\boldsymbol{\tau}}_{-i}$  are the parameters for the posterior  $p(\boldsymbol{\theta}|D_{-i})$ , and  $\nu'_i, \bar{\boldsymbol{\tau}}'_i$  are the parameters for  $\tilde{\mathbf{q}}_i$ . Then by Lemma A.3, the condition that  $\tilde{\mathbf{q}}_i$  achieves the supremum (21) is equivalent to

$$\frac{g(\nu'_i, \bar{\boldsymbol{\tau}}'_i)}{g(\nu'_i + \nu_{-i} - \nu_0, \frac{\nu'_i \bar{\boldsymbol{\tau}}'_i + \nu_{-i} \bar{\boldsymbol{\tau}}_{-i} - \nu_0 \bar{\boldsymbol{\tau}}_0}{\nu'_i + \nu_{-i} - \nu_0})} = \frac{g(\nu_i, \bar{\boldsymbol{\tau}}_i)}{g(\nu_i + \nu_{-i} - \nu_0, \frac{\nu_i \bar{\boldsymbol{\tau}}_i + \nu_{-i} \bar{\boldsymbol{\tau}}_{-i} - \nu_0 \bar{\boldsymbol{\tau}}_0}{\nu_i + \nu_{-i} - \nu_0})}. \quad (22)$$

which, by our definition of  $h(\cdot)$ , is just

$$h_{D_{-i}}(\nu'_i, \bar{\boldsymbol{\tau}}'_i) = h_{D_{-i}}(\nu_i, \bar{\boldsymbol{\tau}}_i), \quad \text{for all } D_{-i} \text{ with } p(D_{-i}|D_i) > 0.$$

Now we are ready to prove Theorem D.2. Since (19) is equivalent to (20), we only need to show that the mechanism is sensitive if and only if for all  $(\nu'_i, \bar{\boldsymbol{\tau}}'_i) \neq (\nu_i, \bar{\boldsymbol{\tau}}_i)$ ,

$$\Pr_{D_{-i}|D_i} [h_{D_{-i}}(\nu'_i, \bar{\boldsymbol{\tau}}'_i) \neq h_{D_{-i}}(\nu_i, \bar{\boldsymbol{\tau}}_i)] > 0.$$

If the above condition holds, then  $\tilde{\mathbf{q}}_i$  with parameters  $(\nu'_i, \bar{\boldsymbol{\tau}}'_i) \neq (\nu_i, \bar{\boldsymbol{\tau}}_i)$  should have a non-zero loss in the expected score (14) compared to the optimal solution  $p(\boldsymbol{\theta}|D_i)$  with parameters  $(\nu_i, \bar{\boldsymbol{\tau}}_i)$ , which means that the mechanism is sensitive. For the other direction, if the condition does not hold, i.e., there exists  $(\nu'_i, \bar{\boldsymbol{\tau}}'_i) \neq (\nu_i, \bar{\boldsymbol{\tau}}_i)$  with

$$\Pr_{D_{-i}|D_i} [h_{D_{-i}}(\nu'_i, \bar{\boldsymbol{\tau}}'_i) \neq h_{D_{-i}}(\nu_i, \bar{\boldsymbol{\tau}}_i)] = 0,$$

then reporting  $(\nu'_i, \bar{\boldsymbol{\tau}}'_i) \neq (\nu_i, \bar{\boldsymbol{\tau}}_i)$  will give the same expected score as truthfully reporting  $(\nu_i, \bar{\boldsymbol{\tau}}_i)$ , which means that the mechanism is not sensitive.
